# Supplementary material
Source: MDPI journal article supplement (https://www.mdpi.com/1424-8247/16/11/1602)
Supplement: s1 [file s1]

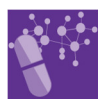

## Supplementary Information

# Synergistic in vitro Antiviral Effect of Combinations of Ivermectin, Essential Oils and 18-(Phthalimid-2-yl)ferruginol Against Arboviruses and Herpesvirus

Liliana Betancur-Galvis <sup>1,\*</sup>, Orlando José Jimenez-Jarava <sup>1</sup>, Fatima Rivas <sup>2</sup>, William E. Mendoza-Hernández <sup>3</sup>, and Miguel A. González-Cardenete <sup>3,\*</sup>

<sup>1</sup> Grupo GRID- Grupo de Investigaciones Dermatológicas, Instituto de Investigaciones Médicas, Facultad de Medicina, Universidad de Antioquia, 050010 Medellín, Colombia

<sup>2</sup> Department of Chemistry, Louisiana State University, 133 Chopping Hall, Baton Rouge, Louisiana 70803, United States.

<sup>3</sup> Instituto de Tecnología Química, Universitat Politècnica de València-Consejo Superior de Investigaciones Científicas, Avda. de los Naranjos s/n, 46022 Valencia, Spain.

Email: migoncar@itq.upv.es

## Contents

- Swissadme analysis for compound **1a** .....Figure S1, page S2
- Swissadme analysis for compound **2** .....Figure S2, page S3
- Table S1: In vitro pharmacokinetic data **1a**: Caco2 permeability .....Table S1, page S4
- Table S2: In vitro pharmacokinetic data **1a**: stability in microsomes and plasma.....Table S2, page S4

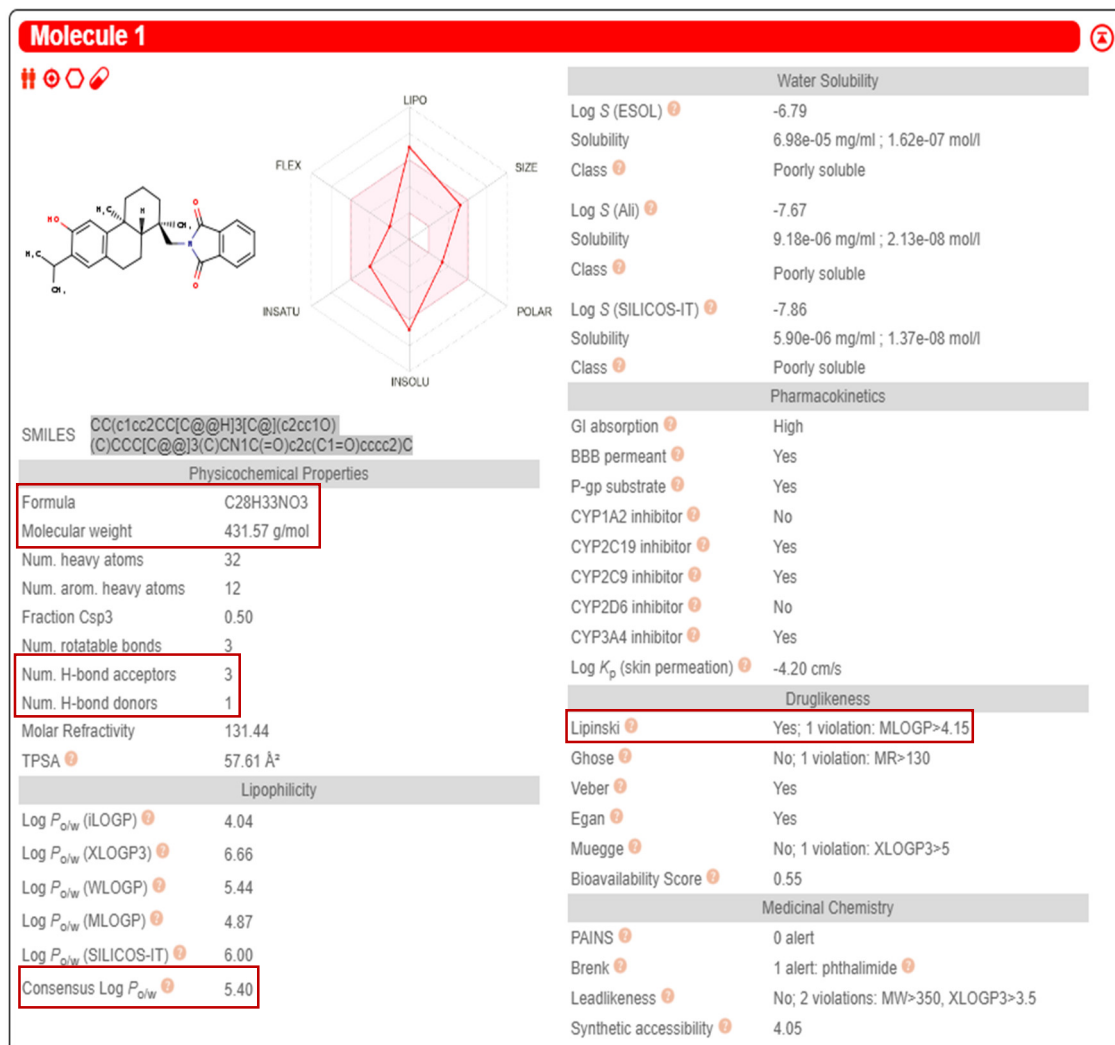

SMILES: CC(c1cc2CC[C@@H]3[C@](c2cc1O)(C)CCC[C@@]3(C)CN1C(=O)c2c(C1=O)cccc2)C

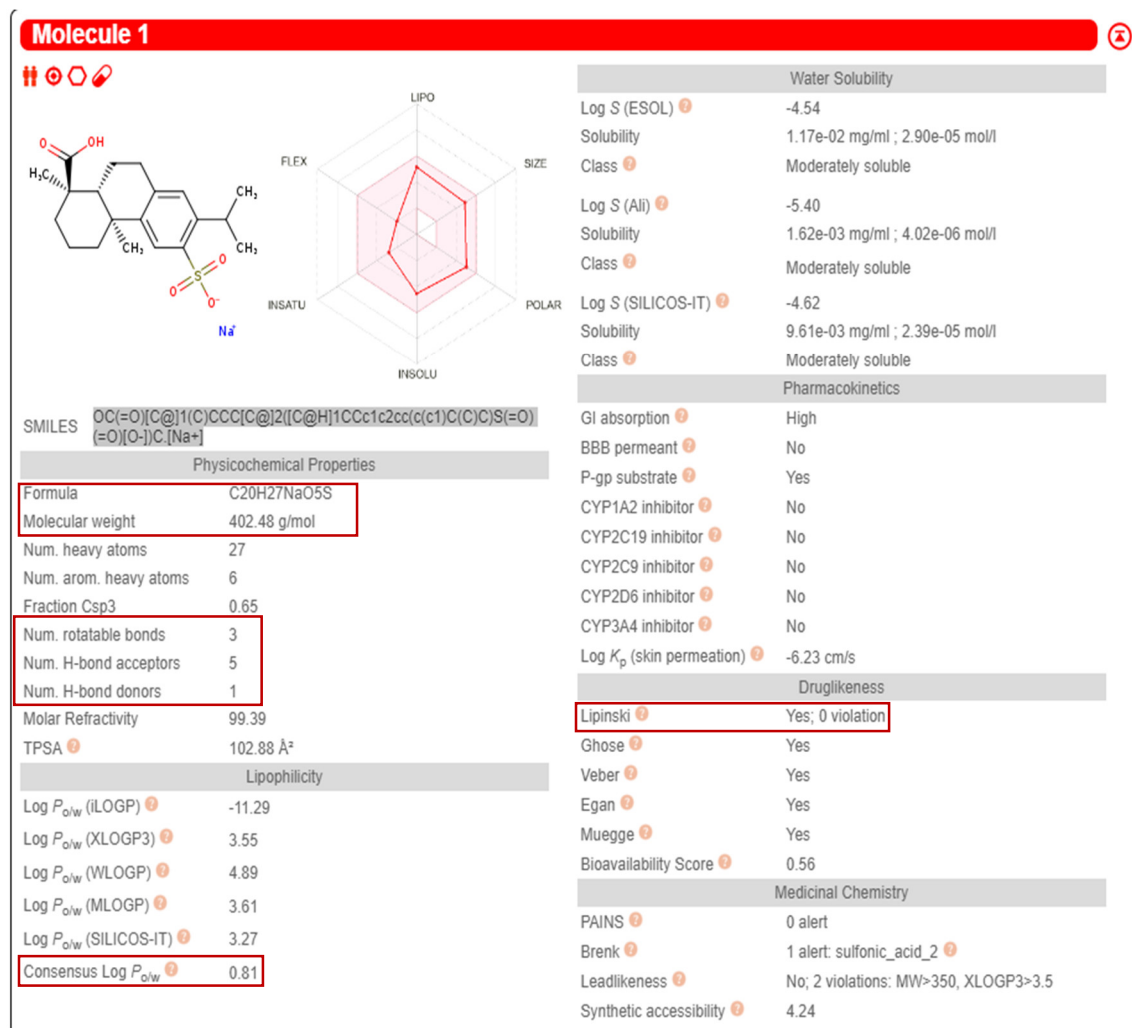

SMILES: OC(=O)[C@]1(C)CCC[C@]2([C@H]1CCc1c2cc(c(c1)C(C)C)S(=O)(=O)[O-])C.[Na+]

**Table S1.** In vitro pharmacokinetic parameters for compound phthFGL (**1a**): Caco2 permeability.<sup>a</sup>

| Compound ID   | Caco2 Permeability  |             |                     |             |                        |
|---------------|---------------------|-------------|---------------------|-------------|------------------------|
|               | AVG Papp A/B (nm/s) | SD Papp A/B | AVG Papp B/A (nm/s) | SD Papp B/A | Efflux Ratio (B2A/A2B) |
| Cambamazepine | 718.9               | 12.5        | 565.9               | 32.8        | 0.8                    |
| Digoxin       | 46.1                | 4.6         | 270.6               | 20.5        | 5.9                    |
| <b>1a</b>     | 227.8               | 49.9        | 92.7                | 28.8        | 0.4                    |

<sup>a</sup> See experimental methods in reference: Ling, T.; Tran, M.; González, M.A.; Gautam, L.N.; Connelly, M.; Wood, R.K.; Fatima, I.; Miranda-Carboni, G.; Rivas, F. (+)-Dehydroabietylamine derivatives target triple-negative breast cancer. *Eur. J. Med. Chem.* **2015**, *102*, 9–13. <https://doi.org/10.1016/j.ejmech.2015.07.034>

**Table S2.** In vitro pharmacokinetic parameters for compound phthFGL (**1a**): stability in microsomes and plasma.<sup>a</sup>

| Compound ID | Metabolic Stability (Human) |     |                   | Metabolic Stability (Mouse) |     |                   |             | Plasma Stability (Human) |      | Plasma Stability (Mouse) |      |
|-------------|-----------------------------|-----|-------------------|-----------------------------|-----|-------------------|-------------|--------------------------|------|--------------------------|------|
|             | t1/2 (hr)                   | STD | Clint (mL/Min/Kg) | t1/2 (hr)                   | STD | Clint (mL/Min/Kg) |             | t1/2 (hr)                | STD  | t1/2 (hr)                | STD  |
| Verapamil   | 2.10                        | 0.2 | 9.9               | 1.32                        | 0.1 | 43.4              | Eucatropine | 0.57                     | 0.01 | 4.96                     | 0.28 |
| <b>1a</b>   | 3.53                        | 1.1 | 5.9               | 3.83                        | 0.8 | 14.9              | <b>1a</b>   | 52.58                    | 6.11 | >>48                     | --   |

<sup>a</sup> See experimental methods in reference: Ling, T.; Tran, M.; González, M.A.; Gautam, L.N.; Connelly, M.; Wood, R.K.; Fatima, I.; Miranda-Carboni, G.; Rivas, F. (+)-Dehydroabietylamine derivatives target triple-negative breast cancer. *Eur. J. Med. Chem.* **2015**, *102*, 9–13. <https://doi.org/10.1016/j.ejmech.2015.07.034>
